# Supplementary material
Source: PubMed Central journal article supplement (PMC3424356)

# Supplemental Figure 1

## A. Subject 1

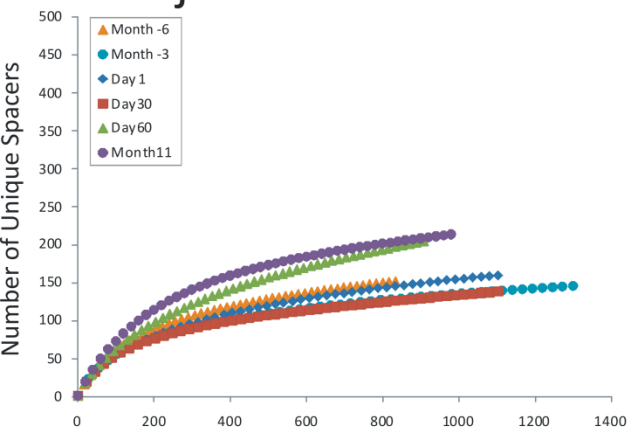

## B. Subject 2

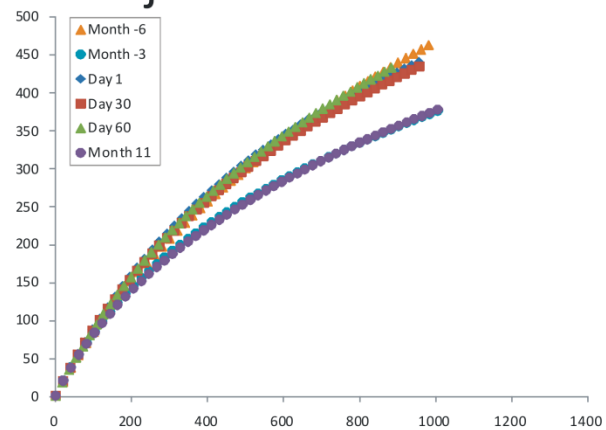

## C. Subject 3

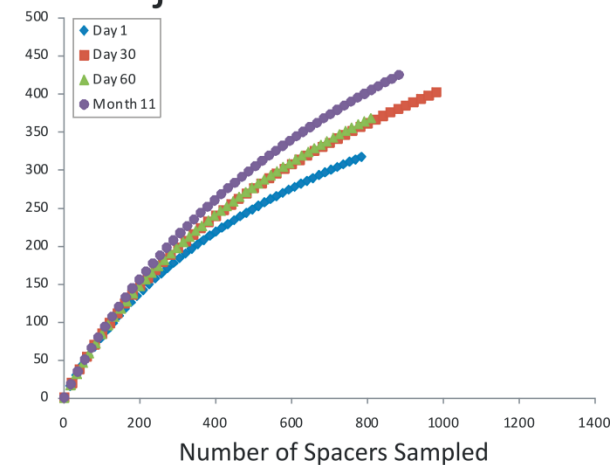

## D. Subject 4

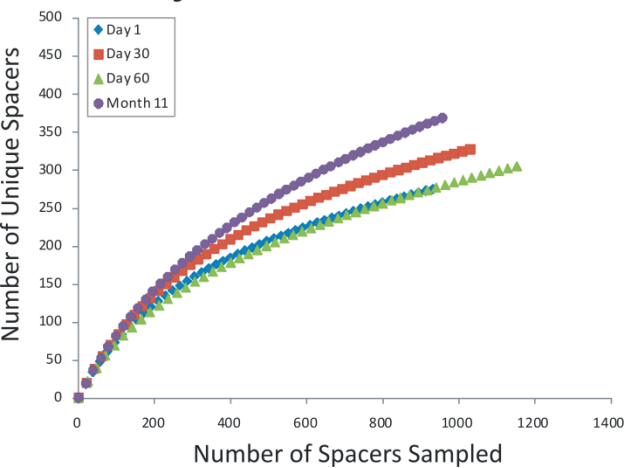

## E. All Subjects

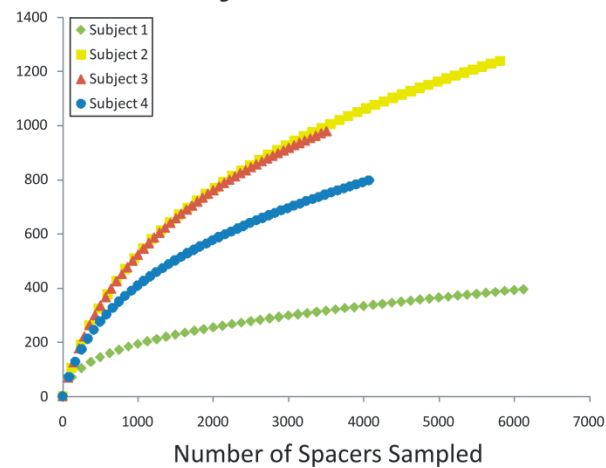

# Supplemental Figure 2

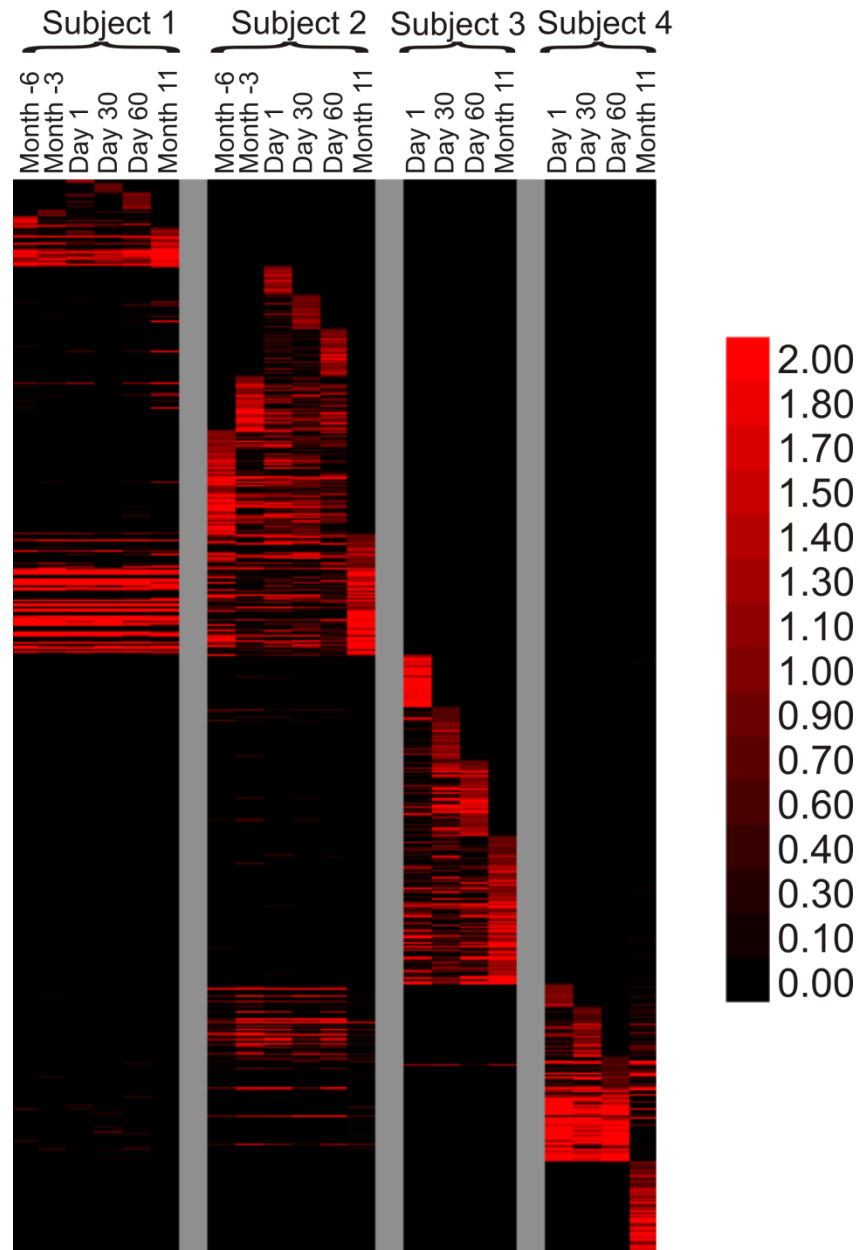

# Supplemental Figure 3

## A. Subject 1

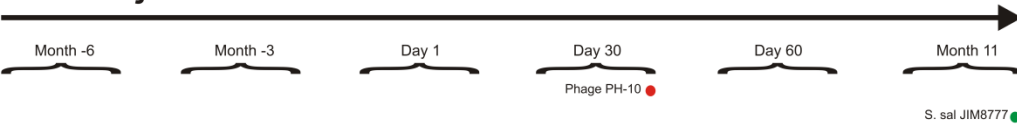

## B. Subject 2

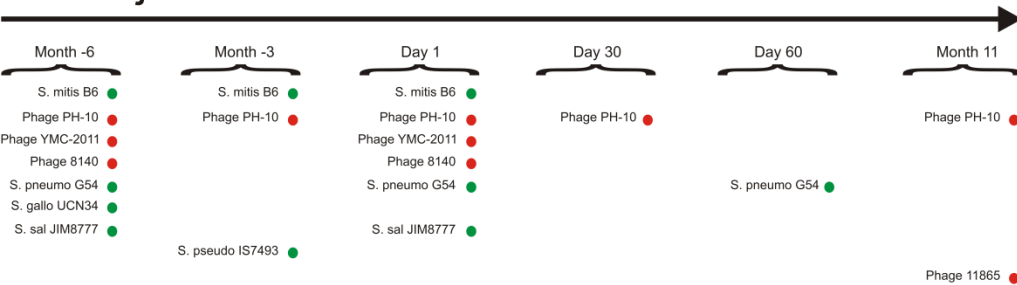

## C. Subject 3

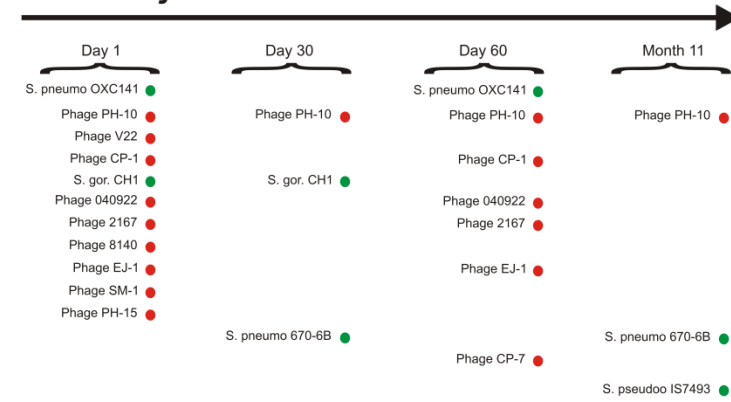

## D. Subject 4

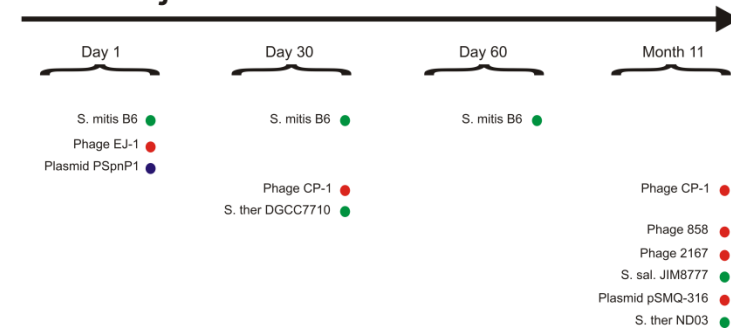

Supplemental Figure 4

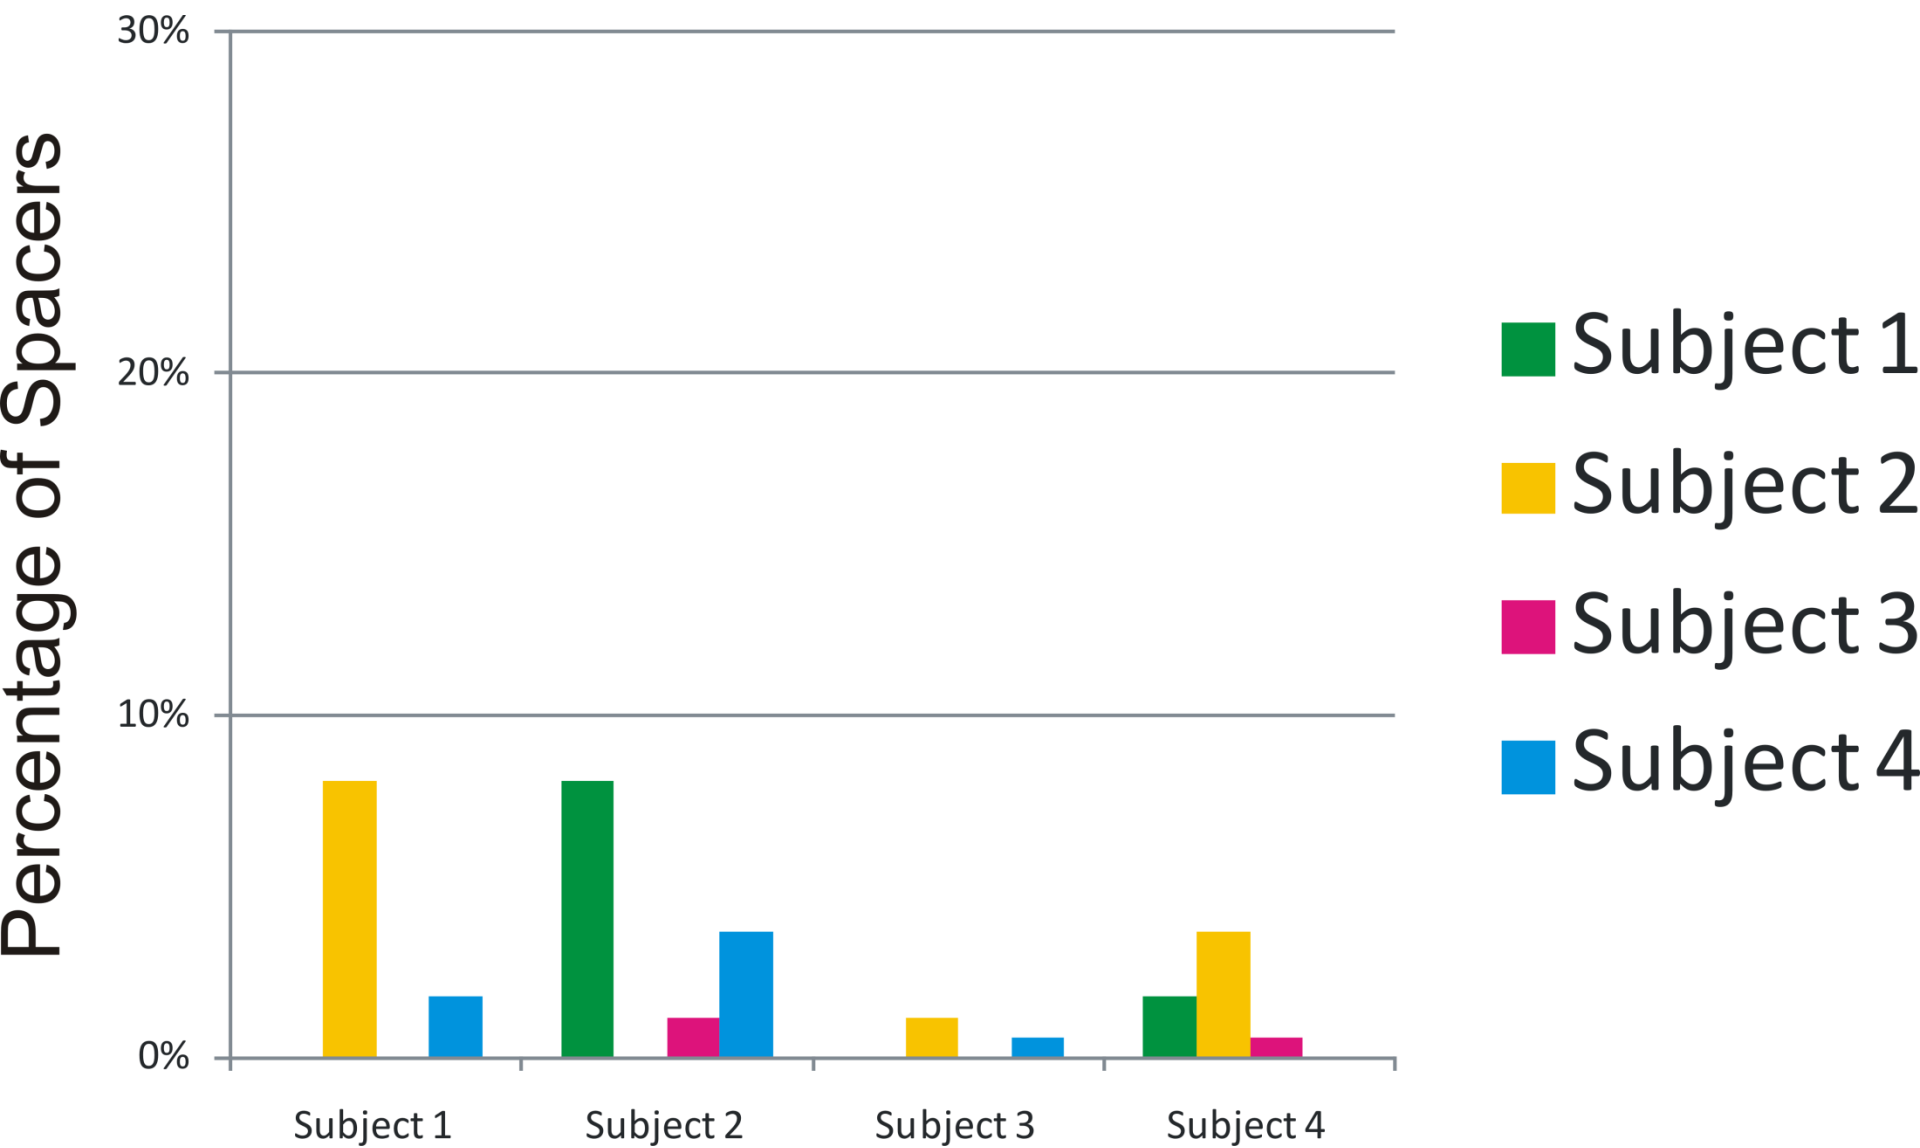

Supplemental Figure 5

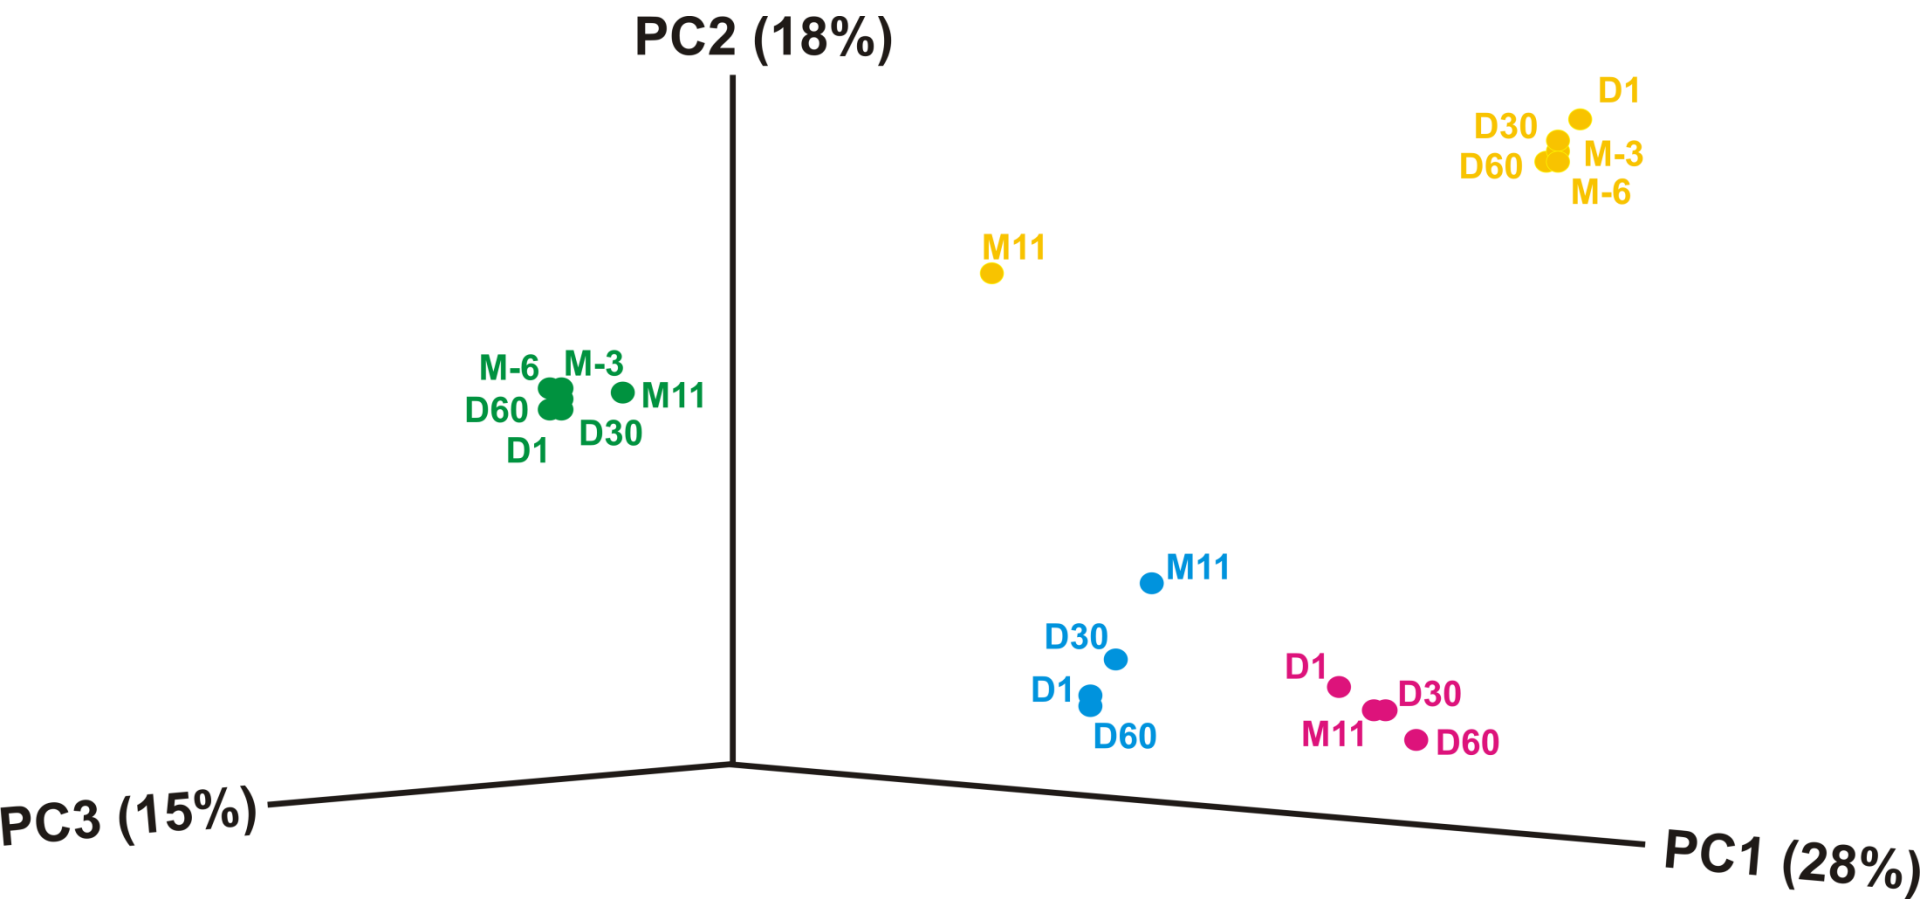

# Supplemental Figure 6

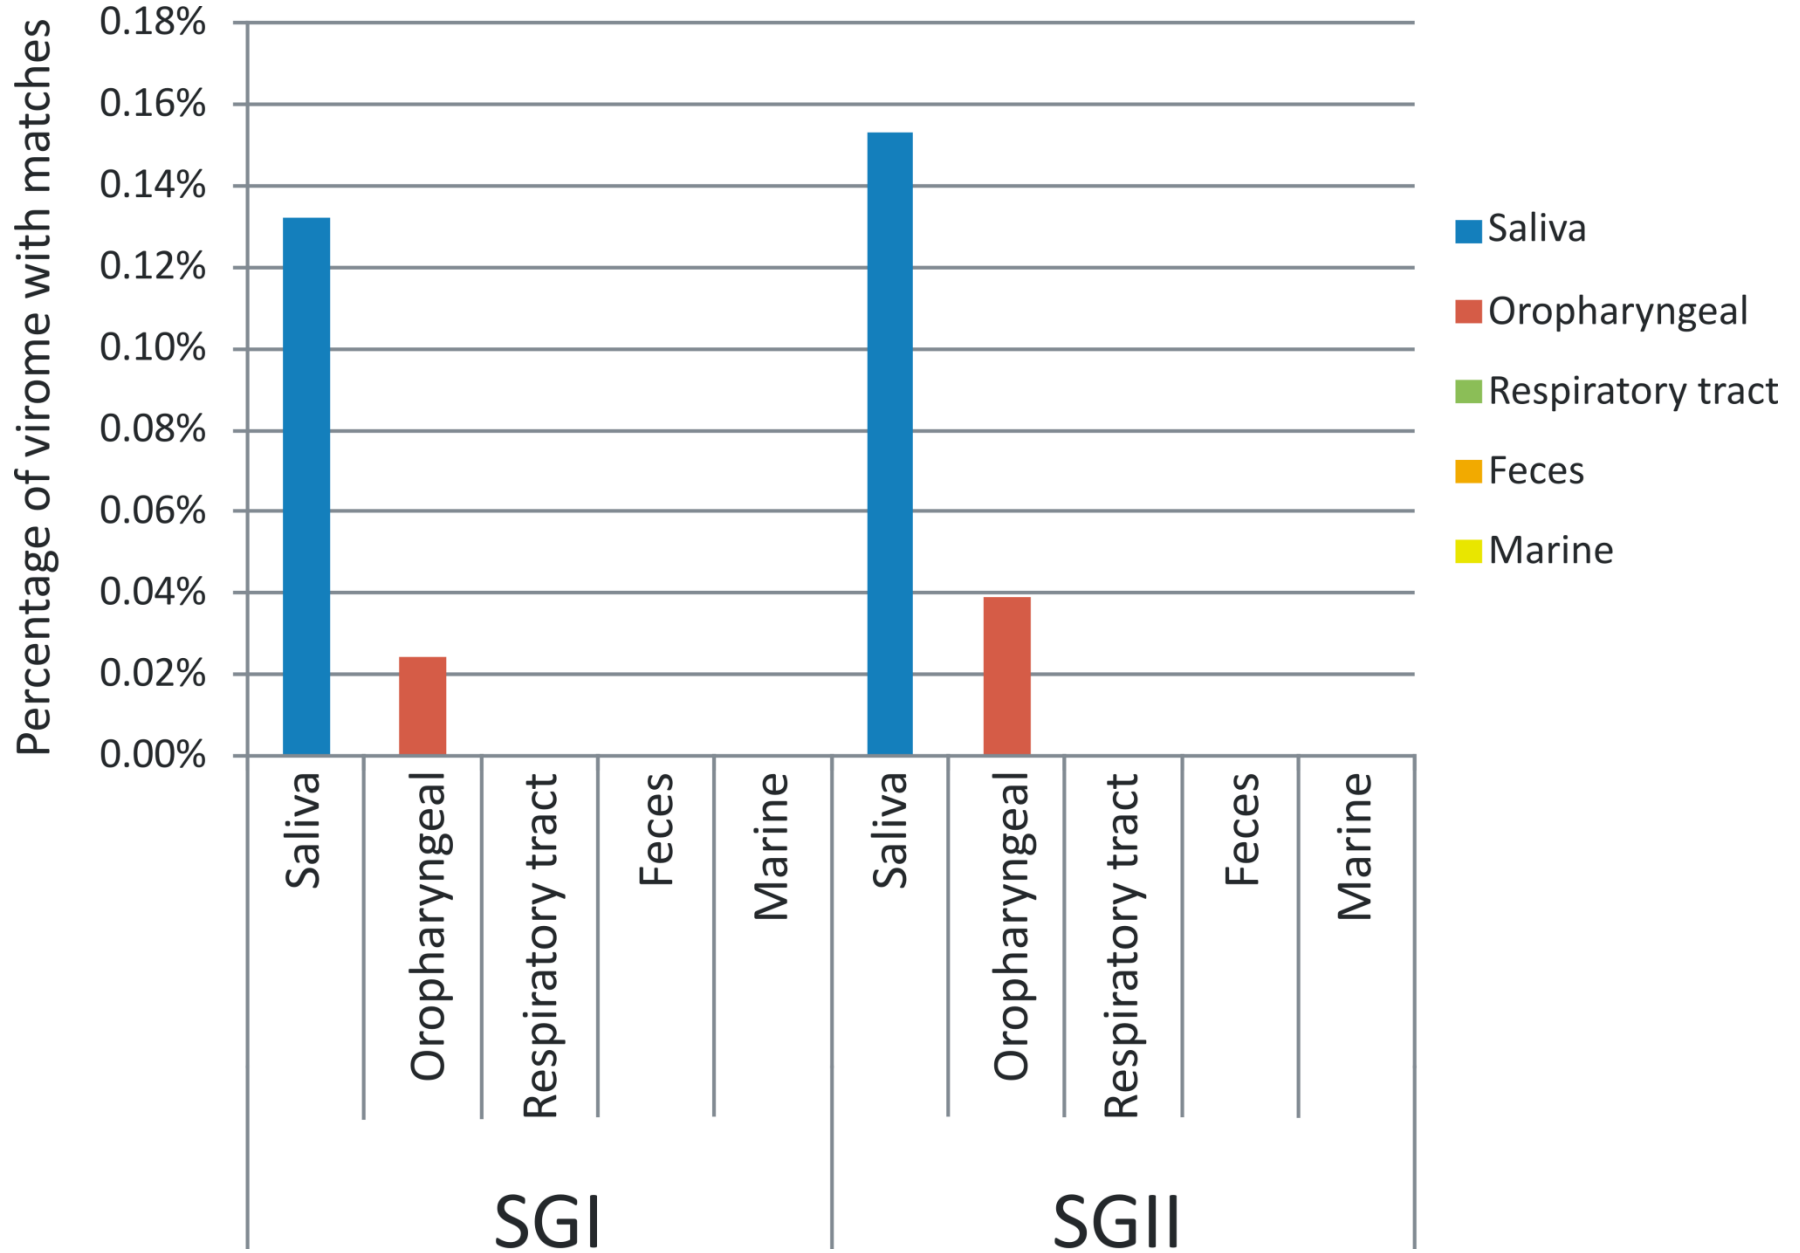

# Supplemental Figure 7

## A. SGI Spacers

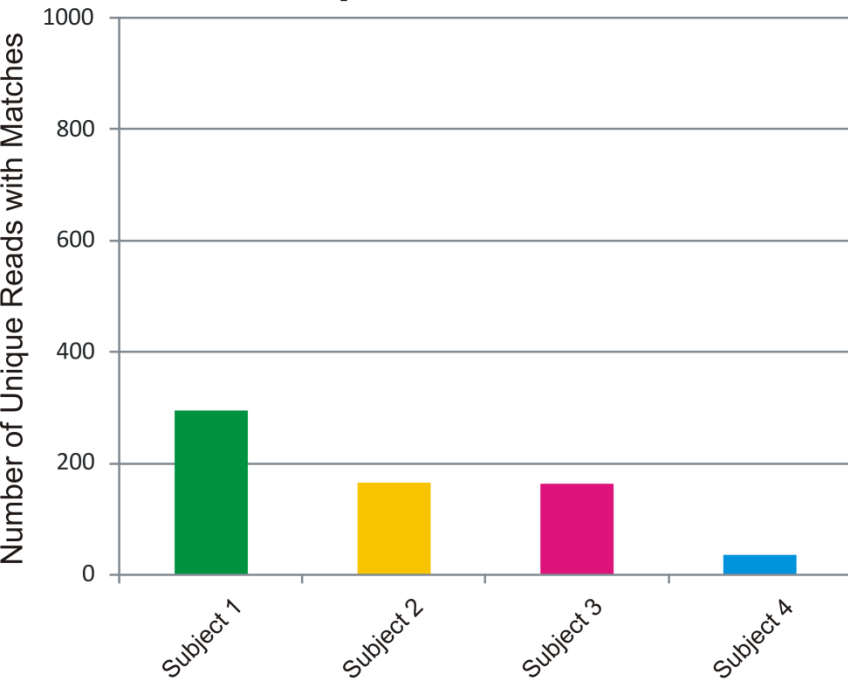

## B. SGII Spacers

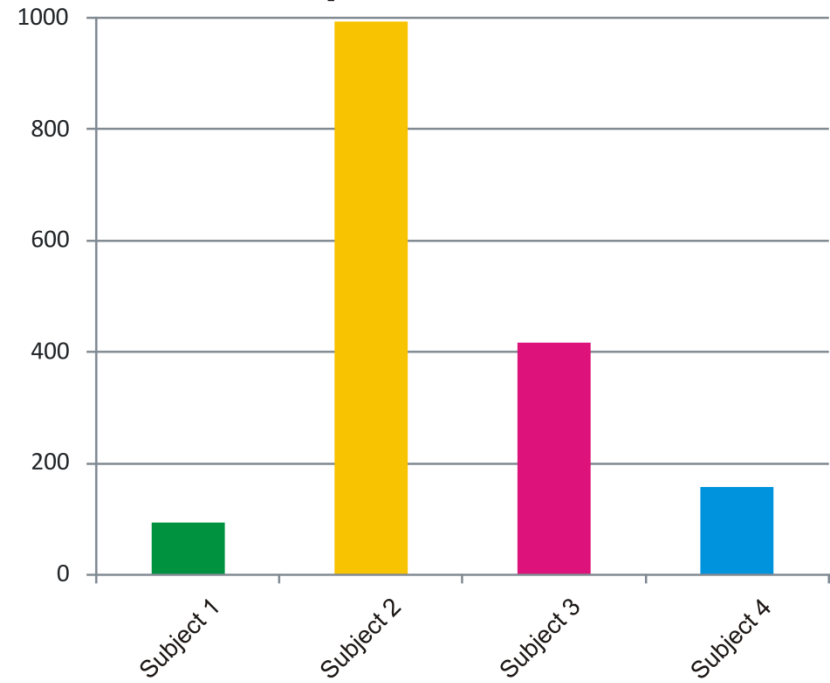

# Supplemental Figure 8

## A. SGII

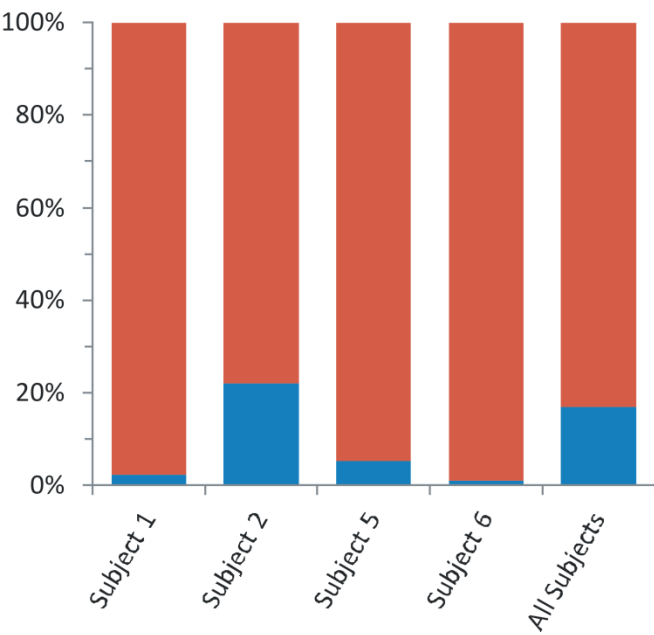

## B. SGI

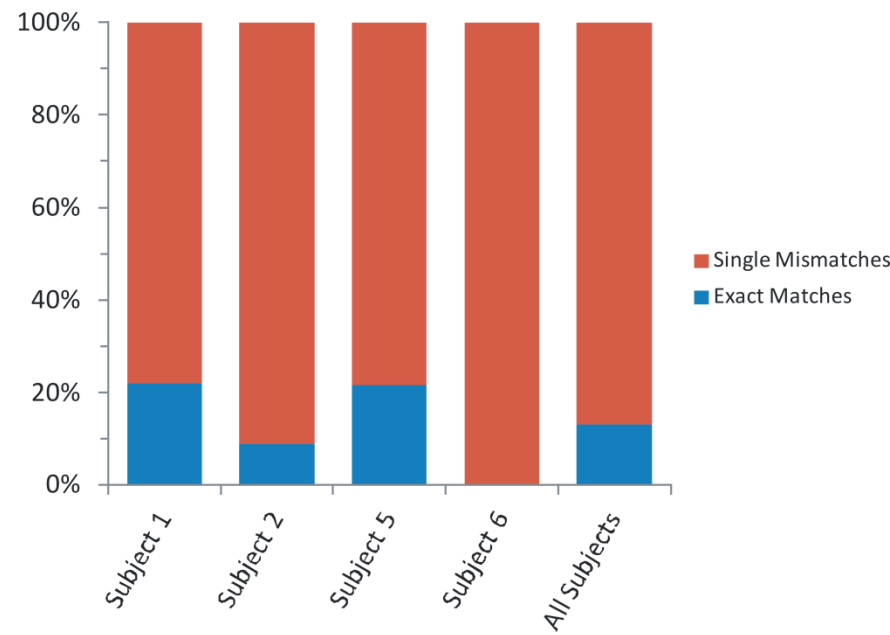



# Supplemental Figure 9

## A. Subject 1

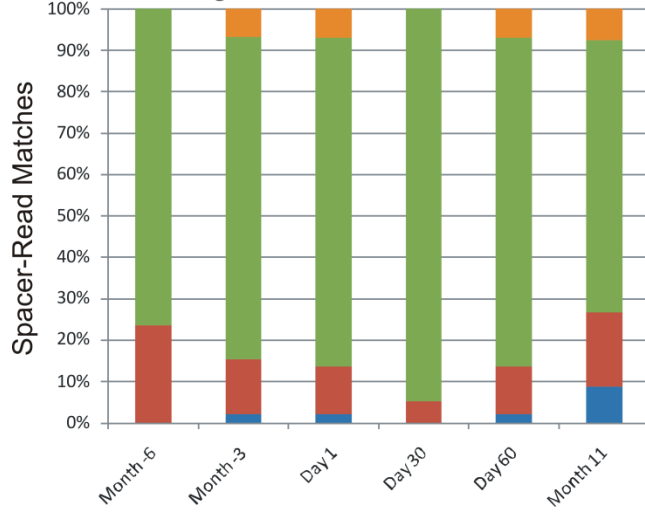

## B. Subject 2

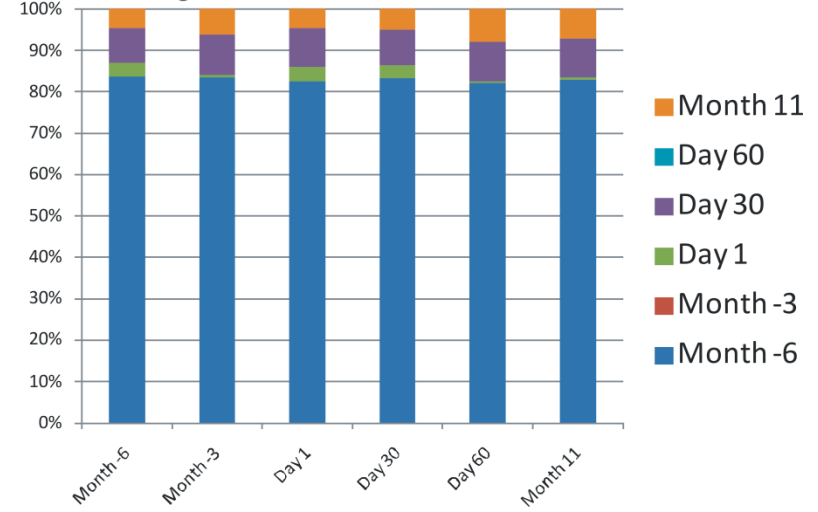

## C. Subject 3

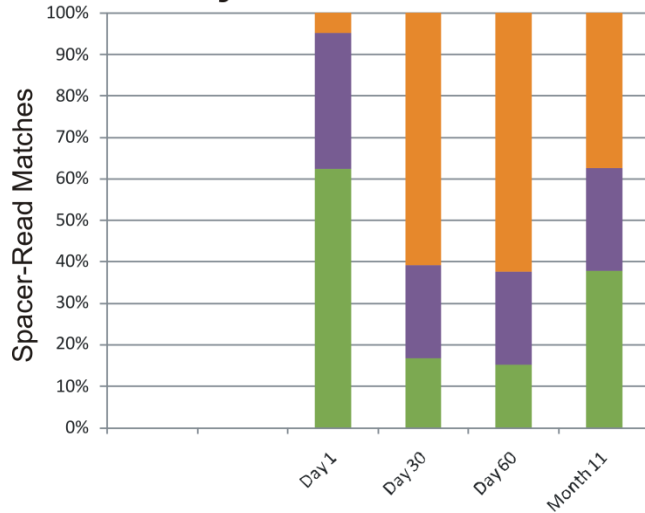

## D. Subject 4

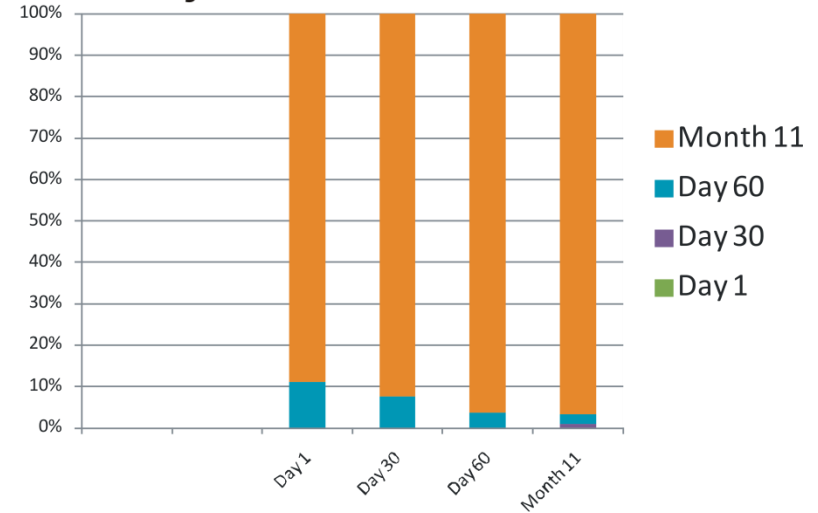

# Supplemental Figure 10

## SGI Spacers

A. Subject 1

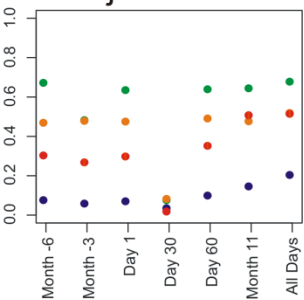

B. Subject 2

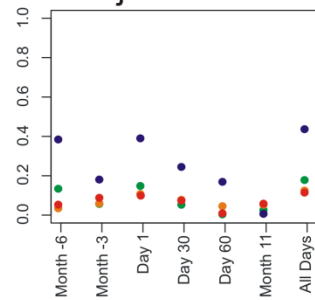

C. Subject 3

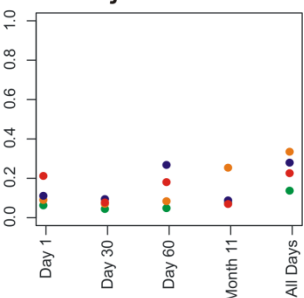

D. Subject 4

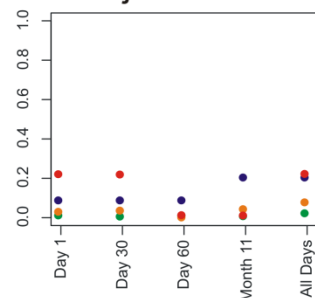

## SGII Spacers

E. Subject 1

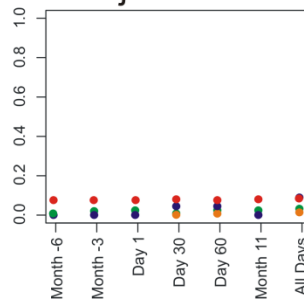

F. Subject 2

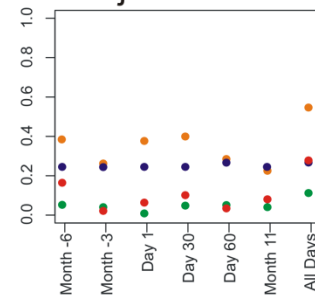

G. Subject 3

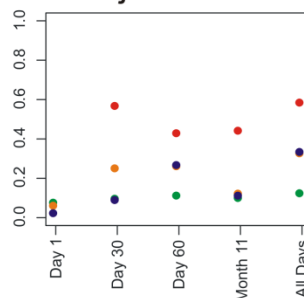

H. Subject 4

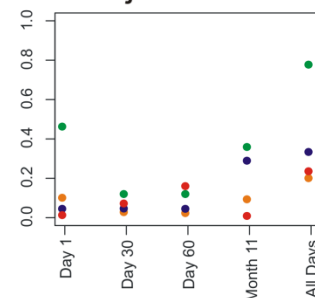

■ Subject 1

■ Subject 2

■ Subject 3

■ Subject 4

# Supplemental Figure 11

## A. SGI Spacer-Read Matches

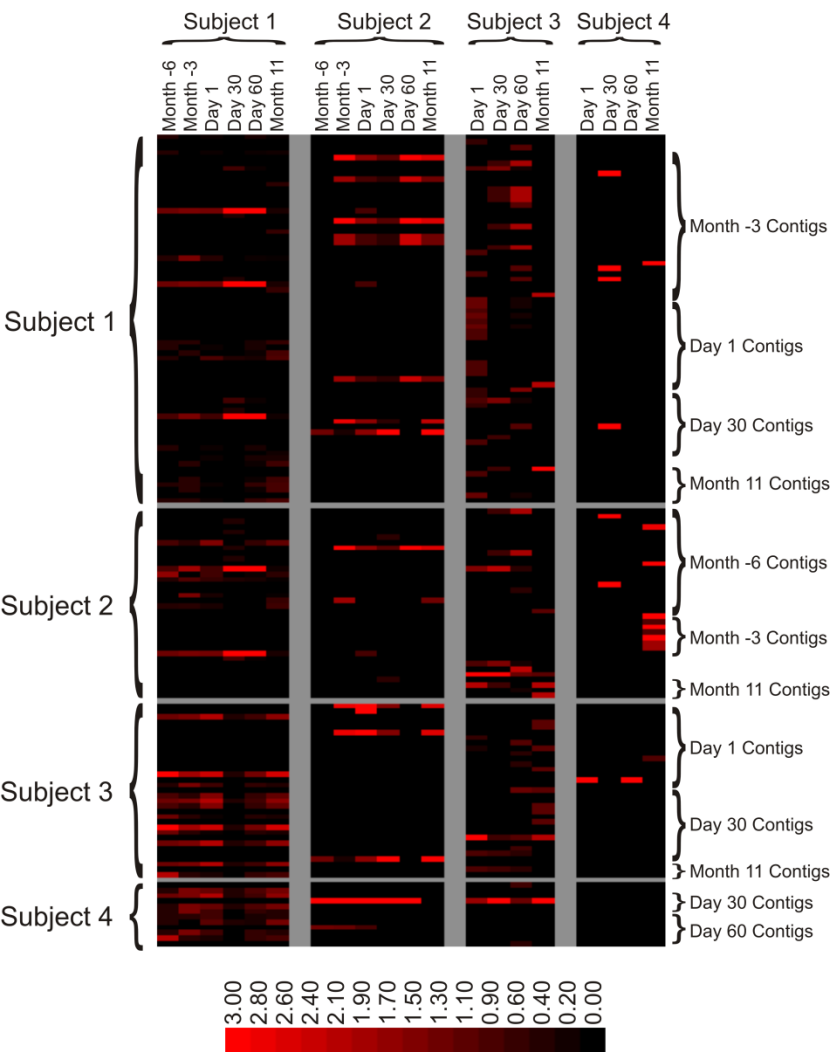

## B. SGI Spacer-Read Matches

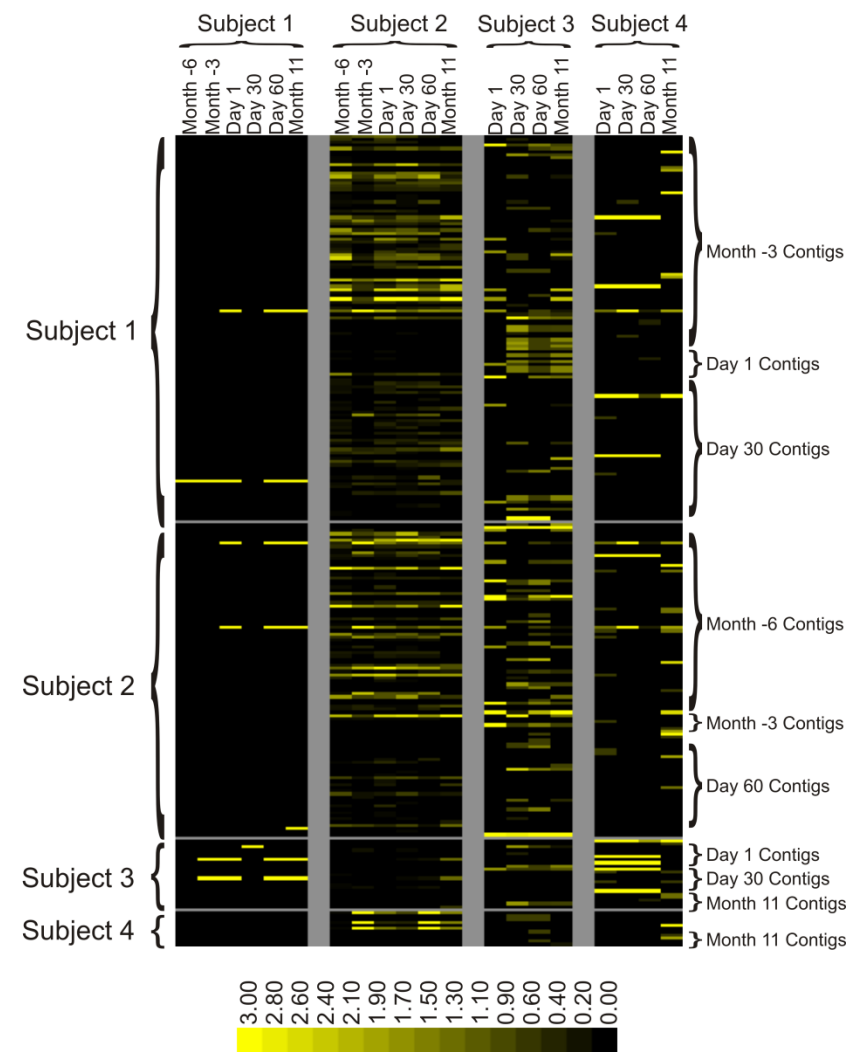

# Supplemental Figure 12

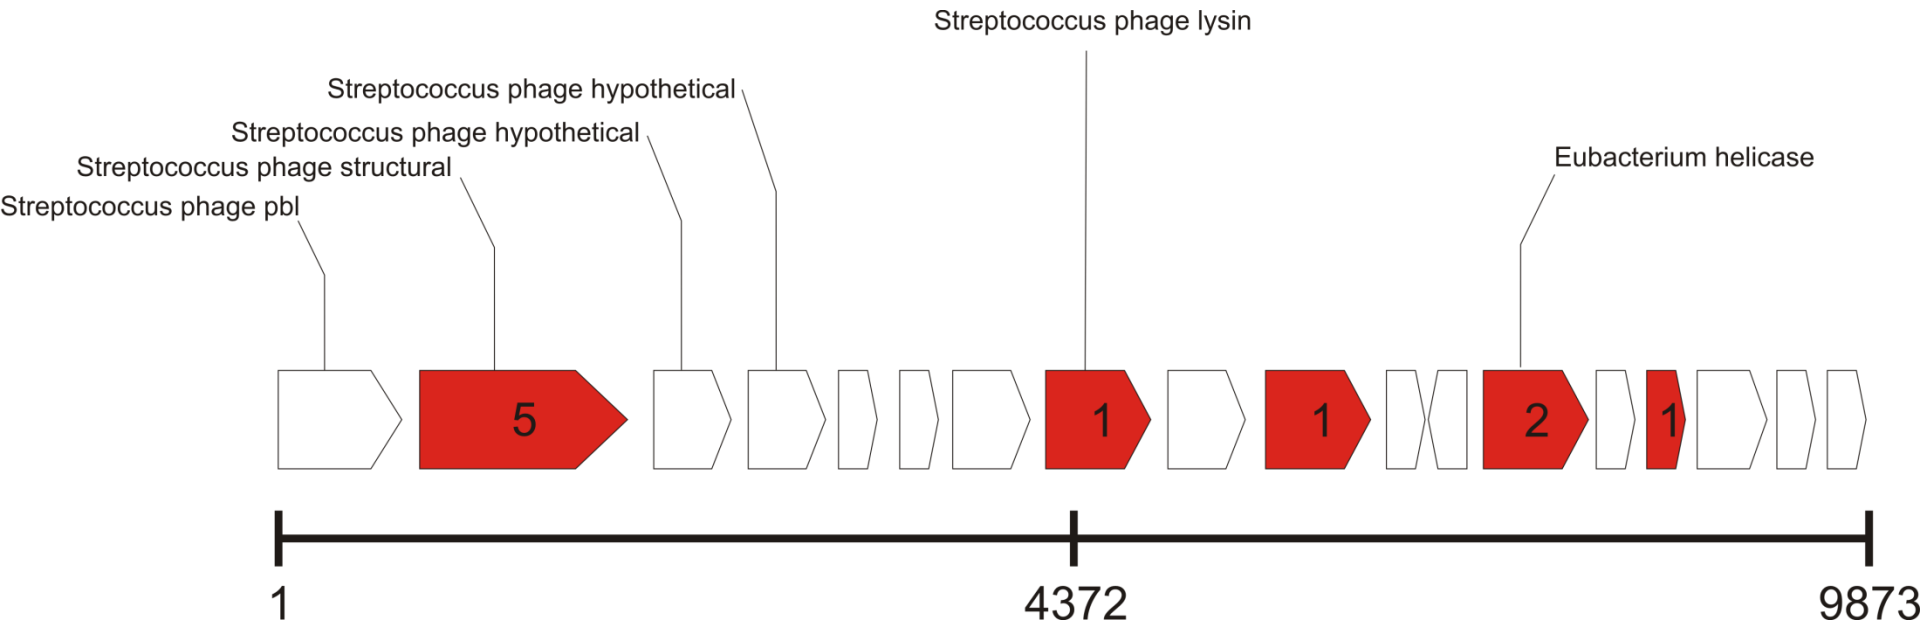

# Supplemental Figure 13

## SGI Spacers

A. Group I 5' Sequence

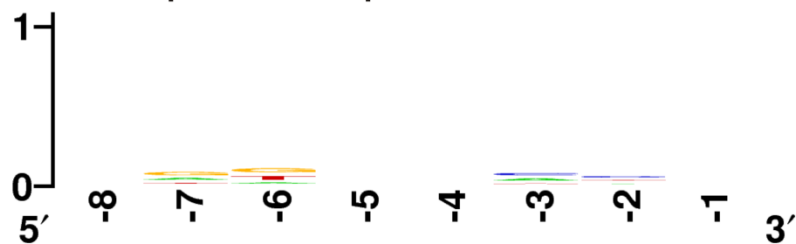

B. Group I 3' Sequence

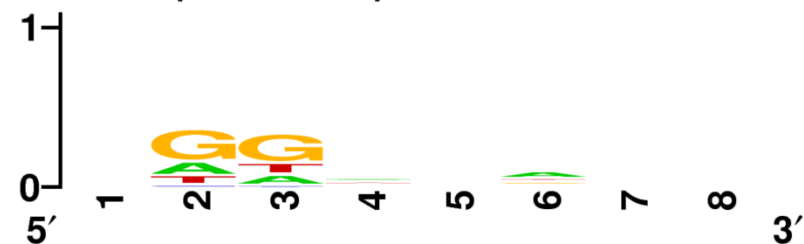

## SGII Spacers

C. Group II 5' Sequence

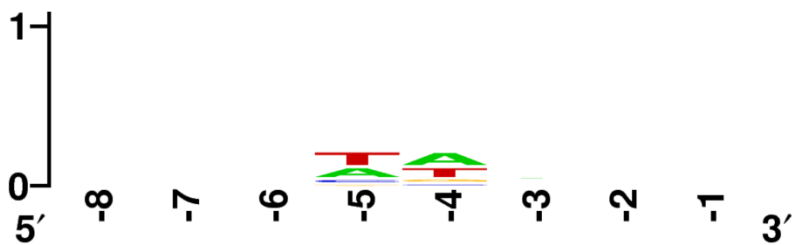

D. Group II 3' Sequence

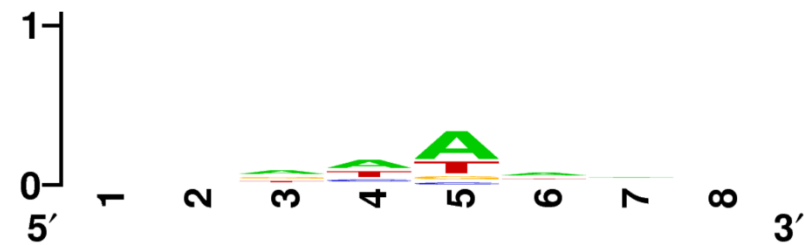

Supplement: NIHMS372493-supplement-Supp_Fig_S1-S13.pdf [file NIHMS372493-supplement-Supp_Fig_S1-S13.pdf]
